# Supplementary material for: Regarding the Possible Impact of Forest Fires on the Radioactive Pollution of Groundwater in the Chornobyl Exclusion Zone
Source: Research Square preprint supplement (doi:10.21203/rs.3.rs-5926363/v1), 2025-02-03
Supplement: Supplementary file 1 [file a89e5f53537fc4ea48c14696.docx]

Figure 4 – Cumulative 90Sr activity leached from a pinewood ash sample with water, Bq

Figure 5 – Cumulative 90Sr activity leached from a forest litter ash sample with water, Bq

Figure 7 - Dynamics of change in specific activity of 90Sr in drilled well K-2/1, located downstream of groundwater flow from the burn site in 2020 (according to data from the SSE Ecocentre)

Figure 8 - Dynamics of change in specific activity of 90Sr in drilled well K-2/2, located downstream of groundwater flow from the burn site in 2020 (according to data from the SSE Ecocentre)
